# Supplementary material for: Overexpression of Peroxisome-Localized GmABCA7 Promotes Seed Germination in Arabidopsis thaliana
Source: MDPI journal article supplement (doi:10.3390/ijms23042389), 2022-02-21
Supplement: s1 [file s1]

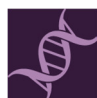

**Table S1.** The list of primers used in PCR reactions.

| Primer name          | Primer sequences (5'→3')           |
|----------------------|------------------------------------|
| GmCYP2.1-RT-F        | CGGGACCAGTGTGCTTCTTCA              |
| GmCYP2.1-RT-R        | CCCCTCCACTACAAAGGCTCG              |
| AtTIP41-RT-F         | CTGGCTGACAATGGAGTGTCACTTCTG        |
| AtTIP41-RT-R         | GAACAGTTGGTGCCTCATCTTCG            |
| GmABCA7-RT-1F        | GGCAGACTTAAAAATCTTAAAGGCTCAC       |
| GmABCA7-RT-1R        | GCACGCTTGACAACATTCCATAAGC          |
| GmABCA7-RT-2F        | CAT TCC ATG GAA GAG GCA GAA GCC    |
| GmABCA7-RT-2R        | CAT TTG GGG TGA GTT TCT GCA CCA TG |
| GmABCA7-F            | T ATGGCAAATCCTGTTCCCGCGA           |
| GmABCA7 -R           | TTATGACAAGGTGTCAAATGCCT            |
| YFP- <i>KpnI</i> -FP | GGGGTACCAGCACGACACACTTGTCTAC       |
| YFP- <i>KpnI</i> -RP | GGGGTACCCTGTACAGCTCGTCCATGC        |

|           |                                                                                                                                                                 |                                                 |     |
|-----------|-----------------------------------------------------------------------------------------------------------------------------------------------------------------|-------------------------------------------------|-----|
| GmABCA7   | MANVPASFTQANALLRKNLTFRKRNVRKNAQLVLPPLILELLFALQRLDTQFC                                                                                                           | CSIFKCGCMCANNTTTTQEGHSRCPDSEKVCCHYSTSIQA        | 99  |
| AtABCA7   | MADPGPASFTANALLRKNLTFRKRNVRKNAQLVLPPLILELLFALQRLDTQFC                                                                                                           | CSIFKCGCMCANNTTTTQEGHSRCPDSEKVCCHYSTSIQA        | 92  |
| Consensus | na p pasf t anallrknlt krn n l p l ll q l dtq                                                                                                                   | cgc c . . . . . RNRAGKQR. . . . . ELCGLEHSKPDQA |     |
| GmABCA7   | AFCAIPNPFEVPPLLQLPAPPNRAARIPSLPLPDFDASCRRTDSCPTTLFTALNHSFAETVSANMFGSALNVSDFGSDFLASLANNVLGSESTPQSN                                                               |                                                 | 199 |
| AtABCA7   | FECSIFREPIVPPLLQLPAPPNRAARIPSLPLPDFDASCRRTDSCPTTLFTALNHSFAETVSANMFGSALNVSDFGSDFLASLANNVLGSESTPQSN                                                               |                                                 | 183 |
| Consensus | fc ip p wppll q p p r r . . . . . L R D S C R R T G S C P V T I L F T G N R S L G T V S F N S L E T S S V S A N . A S E I L R T L A N N V L G T T V E A D F I N |                                                 |     |
| GmABCA7   | FILEPASFSGLPVYLCTKCTTETESCLSFPSLPAAADNFKCDQALNLVRNSSSEINSELYKGYGRGNSDCQVNEIVSADFNLNNGNGYNVCIVYNSTY                                                              |                                                 | 298 |
| AtABCA7   | FILEPASFSGLPVYLCTKCTTETESCLSFPSLPAAADNFKCDQALNLVRNSSSEINSELYKGYGRGNSDCQVNEIVSADFNLNNGNGYNVCIVYNSTY                                                              |                                                 | 283 |
| Consensus | p s l i y q c . . . . . s f p e c q nlwns e n kgy gn g nei a d l n n nv iwynsty                                                                                 |                                                 |     |
| GmABCA7   | ERHTGCGSSVLLRIPRSINLSNLYQLFLGPCTKMLFEFVKENPKPETSFNLELSSLLCINFFETVVIQLFPVVLITSLVYEKQQLRIIMKMHGLGDG                                                               |                                                 | 398 |
| AtABCA7   | KDDAGNRLIKLIRVPRSNLVSNAYLQFLCGPCTKMLFEFVKENPKPETSFNLELSSLLCINFFETVVIQLFPVVLITSLVYEKQQLRIIMKMHGLGDG                                                              |                                                 | 382 |
| Consensus | g l r prs nl sn ylfql gpct mlfe vk enpkp ets l sl g f f t w i l l f p v l s l v y e k q q l r i n k n h g l g d g                                               |                                                 |     |
| GmABCA7   | PYVMISYGYFLAIVSVYMLCFVIFGSLGLKLFHINDYSIQEVFYFLVNLQIALAFVASFVKTATVYAVIYVFCIGLLAVLEFCFVQNTSEFPRG                                                                  |                                                 | 498 |
| AtABCA7   | PYVMISYAYELIISVLYVILCLMIFGSAIILKPFRLISYSIQEVFYFLVNLQIALAFVASFVKTATVYAVIYVFCIGLLAVLEFCFVQNTSEFPRG                                                                |                                                 | 482 |
| Consensus | pyvni sy yfl isv y c ifgs glkf n ysiqfvyf y nlqialaf v s fs vkt tv yi vfg gli fl f s fprg                                                                       |                                                 |     |
| GmABCA7   | VIIVNEFYPGFALYRGLYELAQFSGQSSSGSGMKVQNLSESTNGMKEVLIIVVEVFLALIAAYYDKISSGSRNPLFLQNPFRKPSLRPSLQ                                                                     |                                                 | 597 |
| AtABCA7   | VIIVNEFYPGFALYRGLYELAQFSGQSSSGSGMKVQNLSESTNGMKEVLIIVVEVFLALIAAYYDKISSGSRNPLFLQNPFRKPSLRPSLQ                                                                     |                                                 | 578 |
| Consensus | wiivne ypgf lyrglyelaqf f g g gnkw s m v i vew l aa y d sg plf l f k p q                                                                                        |                                                 |     |
| GmABCA7   | MQGSKVFSQTEKPDVIEKEKVEQLLEPSINHTVCDVVKVYPGRDGNPDRYAVRGLFLFVPGCECFGMGPNGAGKTSFINNMTGLIKPTSGRFVQ                                                                  |                                                 | 697 |
| AtABCA7   | RQGSKVSVDMEKPDVIEKSKVERLMLESSTSHAVCDNLKKVYPGRDGNPDRYAVRGLFLFVPGCECFGMGPNGAGKTSFINNMTGLIKPTSGRFVQ                                                                |                                                 | 678 |
| Consensus | qgskv ekpdv e kve l l e s h i vcd kkvypgrdgnp k avrgl l vp gecf gnl gpnagkts finnm gl kpts g a vq                                                               |                                                 |     |
| GmABCA7   | GLDITQMDIYITMGVCPQHDLLESITGREHLLFYGRLLKNGSLITQAVEESLMSLNLFHGGVADKQVGRYSGMKRRLSVAISLIGDPRVITYNDEP                                                                |                                                 | 797 |
| AtABCA7   | GLDITQMDIYITMGVCPQHDLLESITGREHLLFYGRLLKNGSLITQAVEESLMSLNLFHGGVADKQVGRYSGMKRRLSVAISLIGDPRVITYNDEP                                                                |                                                 | 778 |
| Consensus | gldi nd yt ngvcpqhdlle wt grehllfygrllknlg l qavees l s nlfhggvadk gkyssgmkrrlsvai slig pnvrv yndep                                                             |                                                 |     |
| GmABCA7   | SSGLDPASRRSLVNVKRAKQNAIITLTHSMEEAEALCDRLGIFVNGSLQCVGNAKELKERYGCTVYFTMTTSSDHEKDVENVQKITPNANKIYHLSG                                                               |                                                 | 897 |
| AtABCA7   | STGLDPASRRSLVNVKRAKQNAIITLTHSMEEAEALCDRLGIFVNGSLQCVGNAKELKERYGCTVYFTMTTSSDHEKDVENVQKITPNANKIYHLSG                                                               |                                                 | 878 |
| Consensus | s gl dpasrk lwv krakqn aiiltthsmeeae lcdrlg ifv g l q c gn kelk rygg yvftmttss he ve pna kiyh g                                                                 |                                                 |     |
| GmABCA7   | TQKFELPKEDVRIADVFQAVDAAKRNFTVSAVGLVDTTLEDVFIKVAREAQAFDTL                                                                                                        |                                                 | 953 |
| AtABCA7   | TQKFELPKEDVRISEVFQAVDAAKRNFTVSAVGLVDTTLEDVFIKVAREAQAFDTL                                                                                                        |                                                 | 934 |
| Consensus | tqkfelpke vri v f q a v a k n f t v a v g l d t t l e d v f i k v a r e a q a f d t l                                                                           |                                                 |     |

**Figure S1.** Amino acid sequence alignment of ABCA7 from soybean and Arabidopsis.

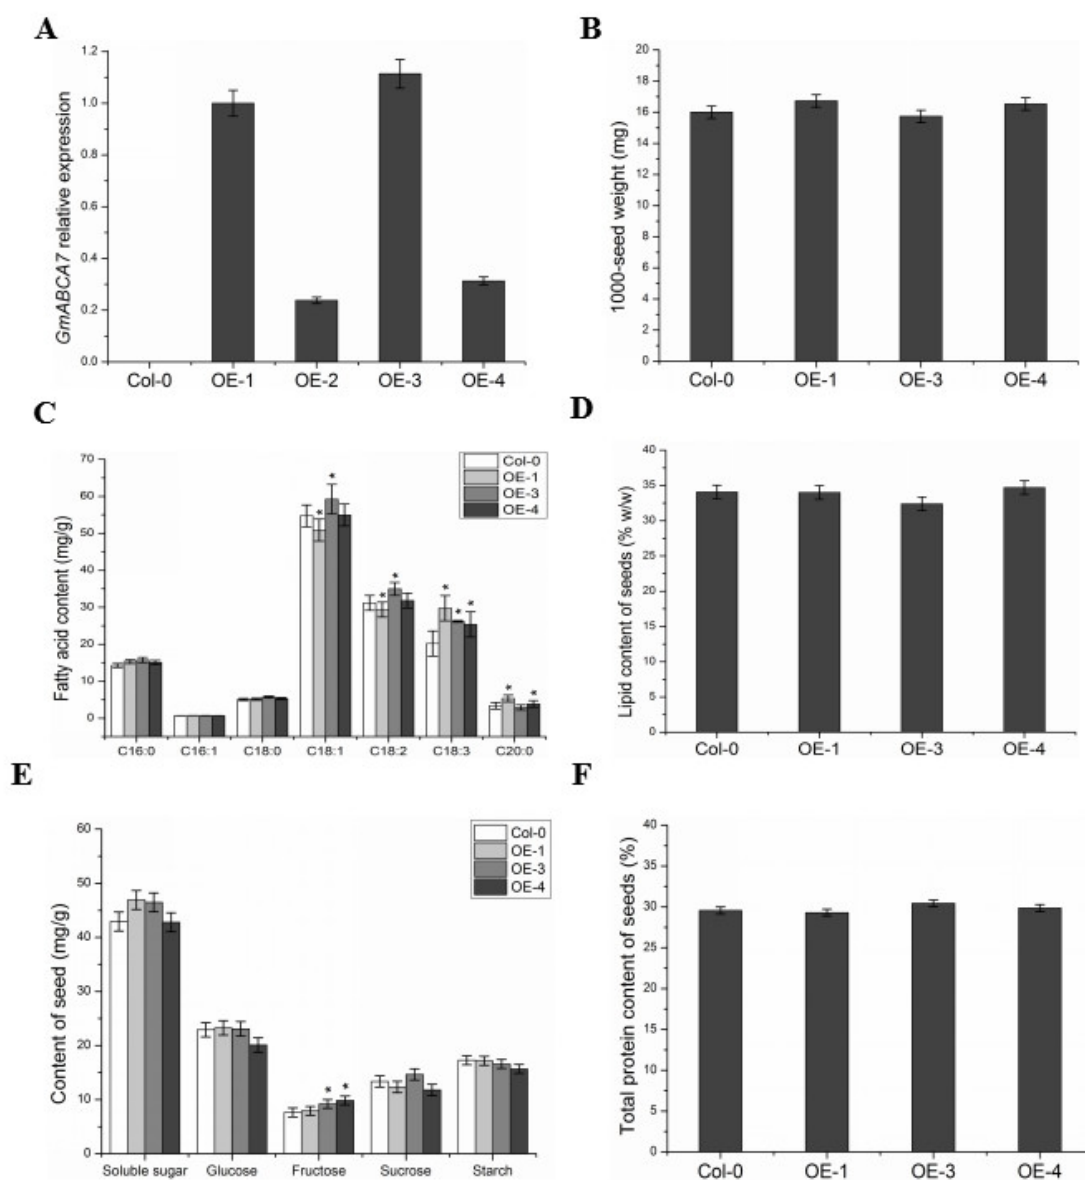

**Figure S2.** Analysis of seed phenotype of wild type (Col-0) and *GmABCA7* transgenic plants. (A) Expression of *GmABCA7* in transgenic plants. The relative expression level of *GmABCA7* was normalized using *AtTIP41* as an internal control. (B) The 1000-seed weight of wild type and *GmABCA7* transgenic plants. 1000 seeds from different lines were used for weighing. (C) Major fatty acid levels in dry seeds of wild type and three transgenic lines (OE-1, OE-3 and OE-4). (D) Total lipid levels in wild type and transgenic seeds. (E) Levels of glucose, fructose, sucrose and starch in dry seeds of wild type and *GmABCA7* transgenic lines. (F) Total protein level in seeds of wild type and *GmABCA7* transgenic plants. Values are means  $\pm$  SE of three independent measurements.

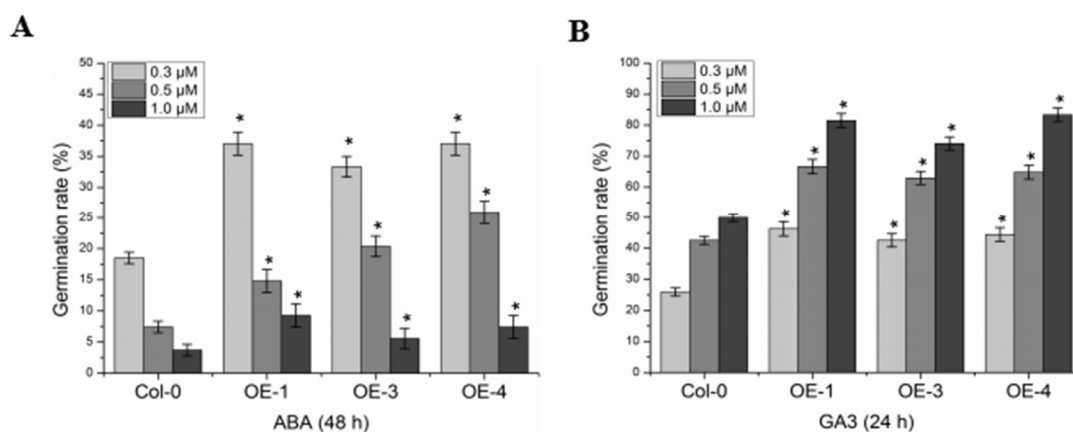

**Figure S3.** Seed germination rates upon ABA and GA3 treatment. (A) Seed germination rates upon treatment with various concentrations of ABA (0.3  $\mu$ M, 0.5  $\mu$ M and 1.0  $\mu$ M). Germination rates were measured 48 h after seeds were sown. (B) Seed germination rates upon treatment with various concentrations of GA3 (0.3  $\mu$ M, 0.5  $\mu$ M and 1.0  $\mu$ M). Germination rates were measured 24 h after seeds were sown. Wild type and GmABCA7 transgenic seeds (OE-1, OE-3 and OE-4) were grown with a photoperiod of 16 h, 22°C /8 h, 20°C (light/dark). Values are means  $\pm$  SE of three independent experiments each using 18 seeds. Asterisks indicate a significant difference compared to the corresponding controls (\*P < 0.05).

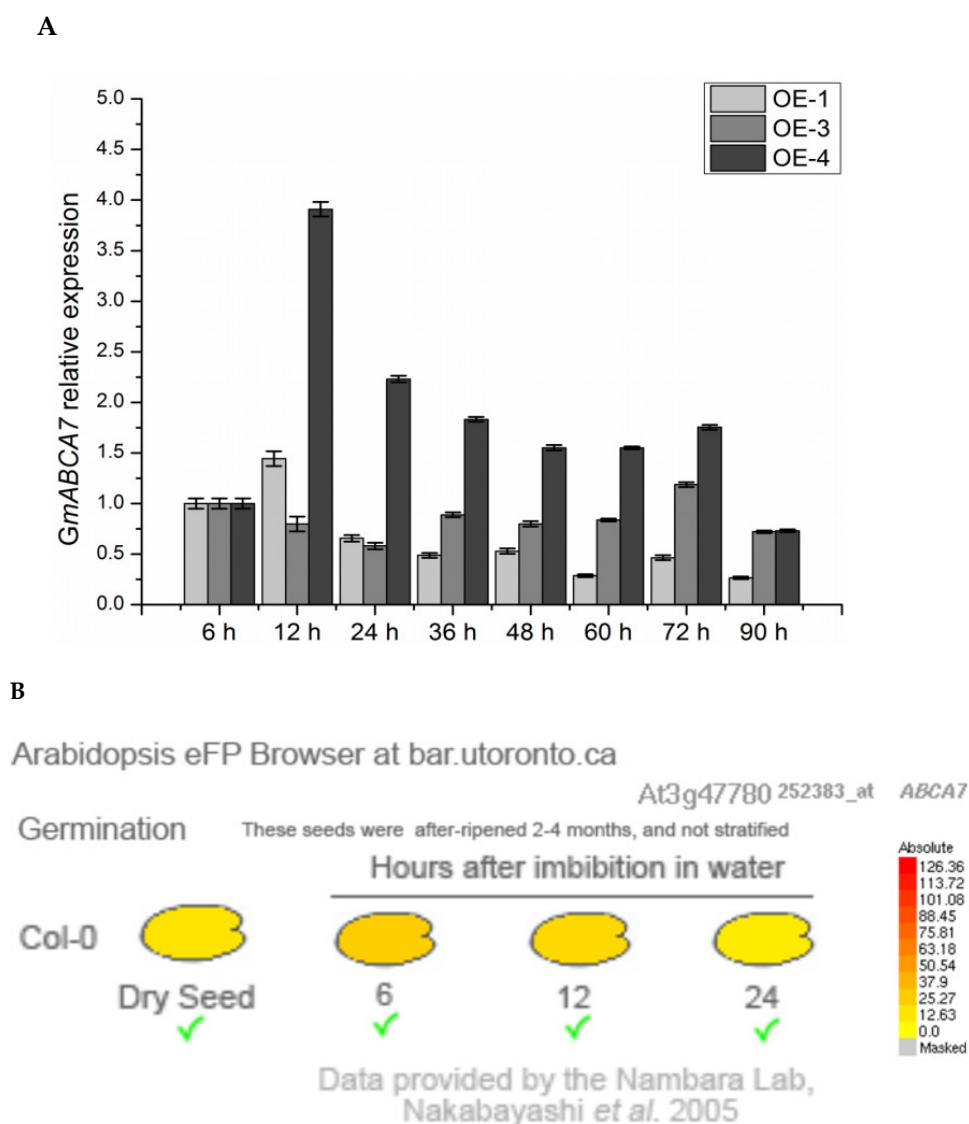

**Figure S4.** Relative expression levels of *GmABCA7* and *AtABCA7* in seeds after imbibition in water. (A) *GmABCA7* expression levels in transgenic seeds. Seeds were imbibed in purified water at 37°C for 6 h, 12 h, 24 h, 48 h, 60 h, 72 h and 90 h prior to quantification of *GmABCA7* expression levels. Values are the means  $\pm$  SE of three independent measurements. (B) *AtABCA7* (AT3G47780) expression levels in wild type seeds. Data were obtained from the website: [http://bar.utoronto.ca/efp\\_arabidopsis/cgi-bin/efpWeb.cgi](http://bar.utoronto.ca/efp_arabidopsis/cgi-bin/efpWeb.cgi)

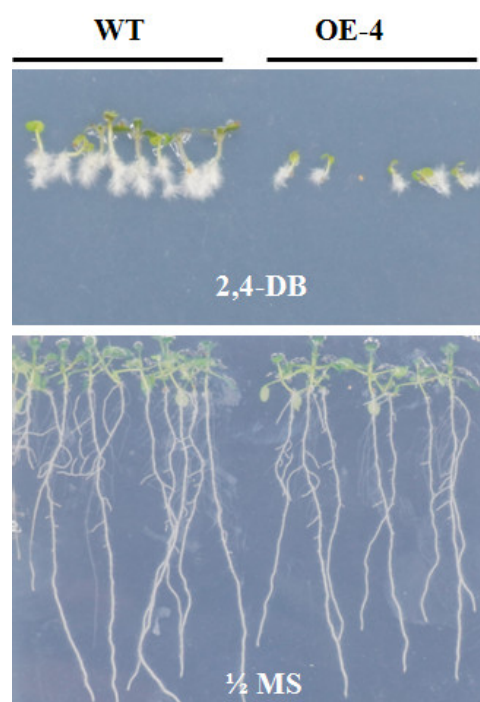

**Figure S5.** Response of wild type (WT, Col-0) and *GmABCA7* transgenic seedlings (OE-4) to 2,4-DB. Seedlings were grown vertically on 1/2 MS plates with or without 0.7 μM 2,4-DB for 9 days in the presence 1% (w/v) sucrose.
